# Supplementary material for: Identification of candidate genes and molecular markers for heat-induced brown discoloration of seed coats in cowpea [Vigna unguiculata (L.) Walp]
Source: PubMed Central journal article supplement (PMC4035059; doi:10.1186/1471-2164-15-328), 2014-05-01

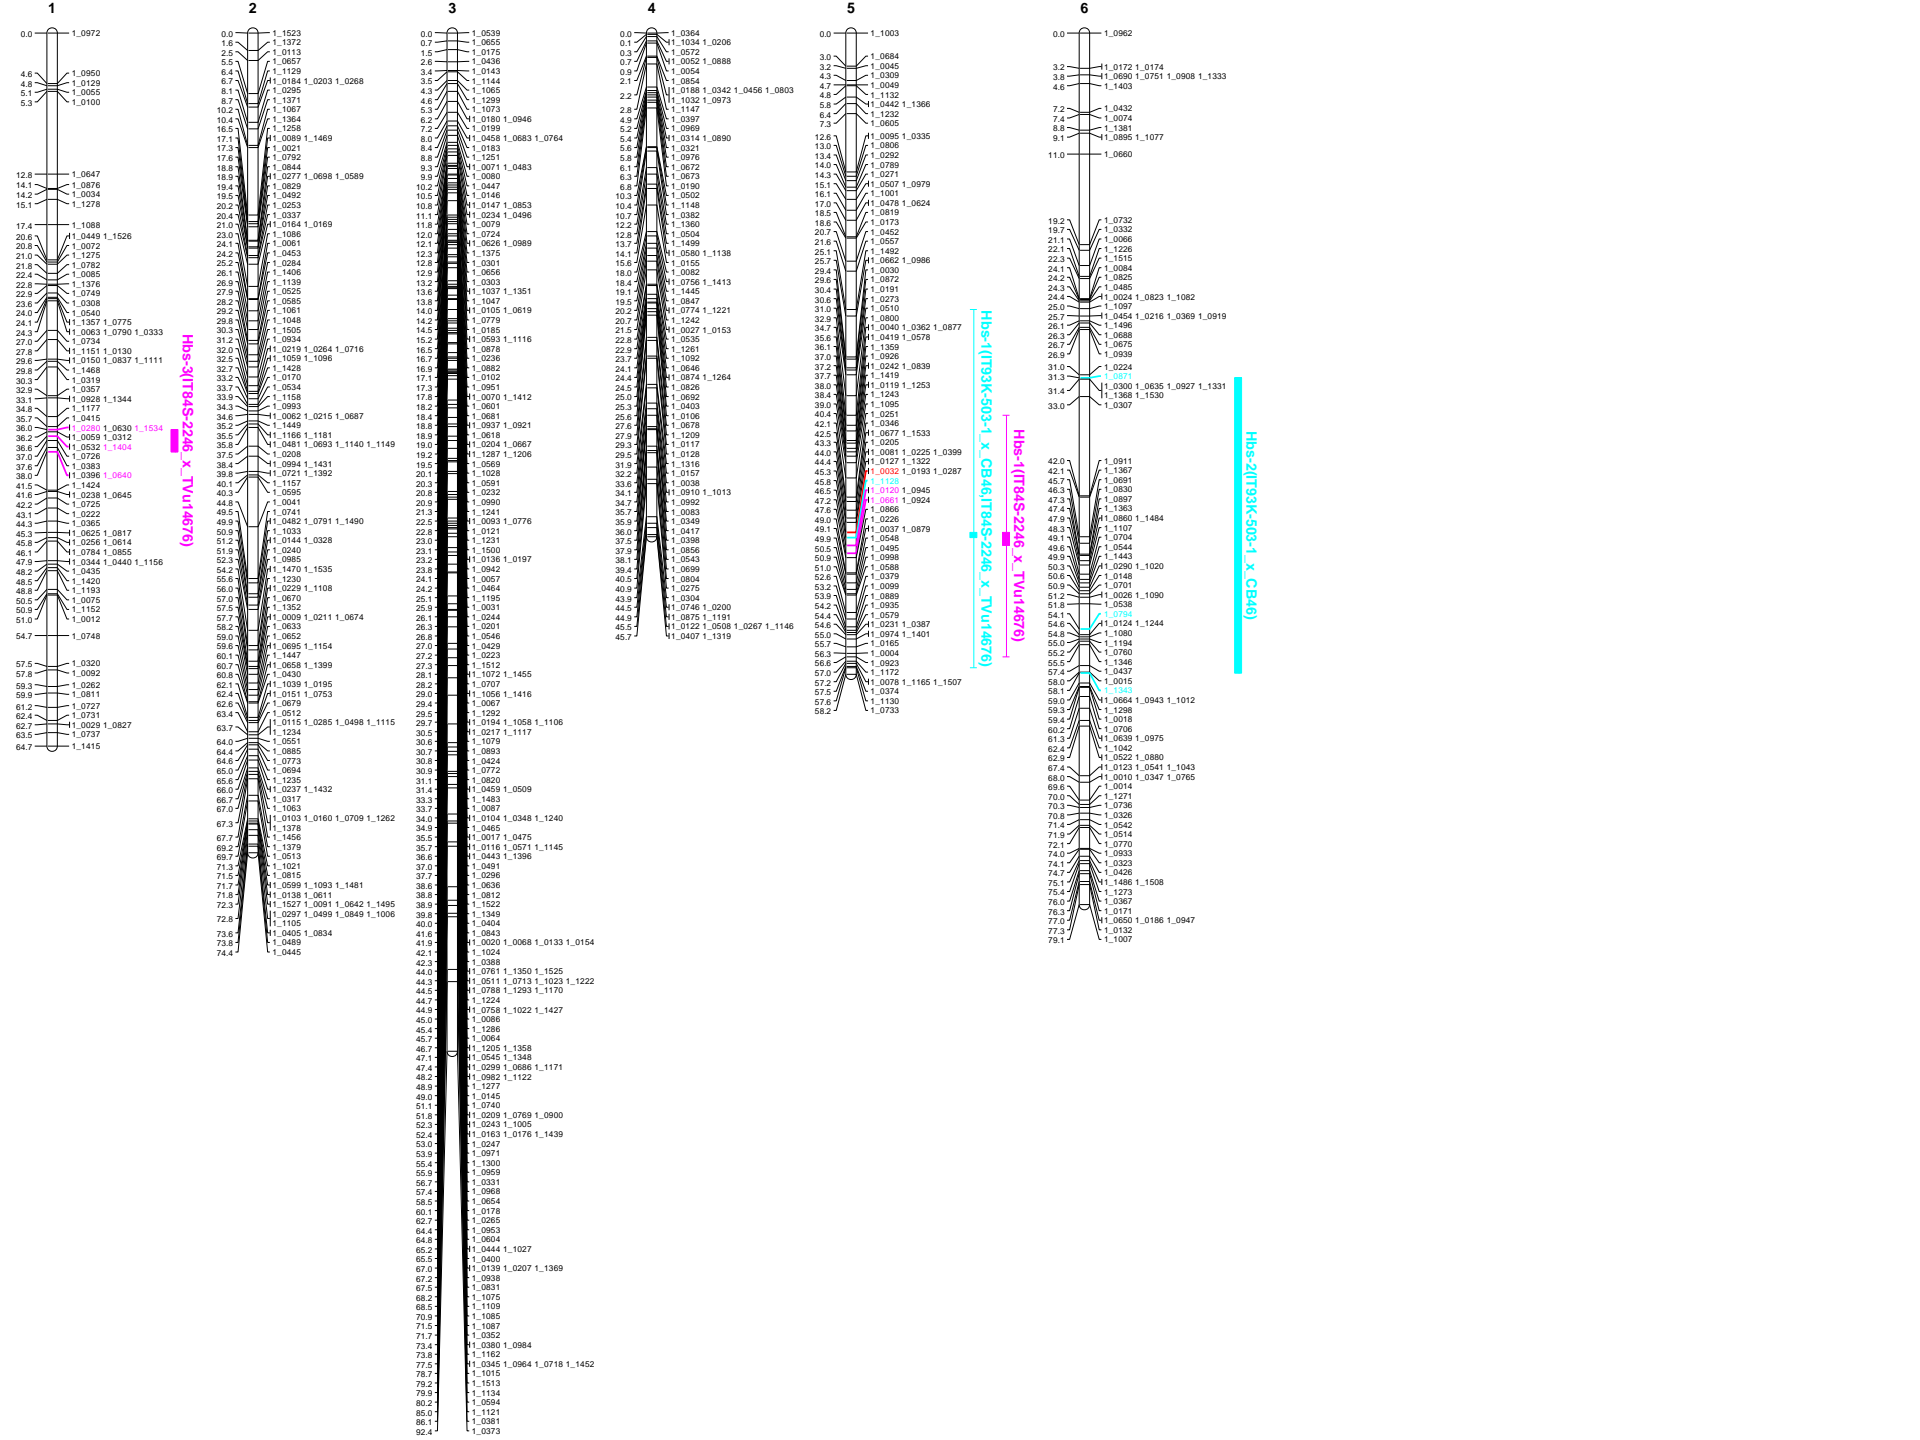

7

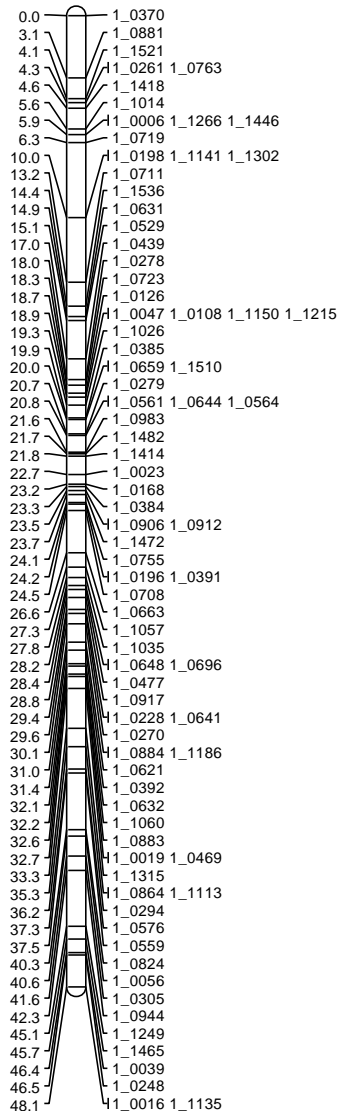

8

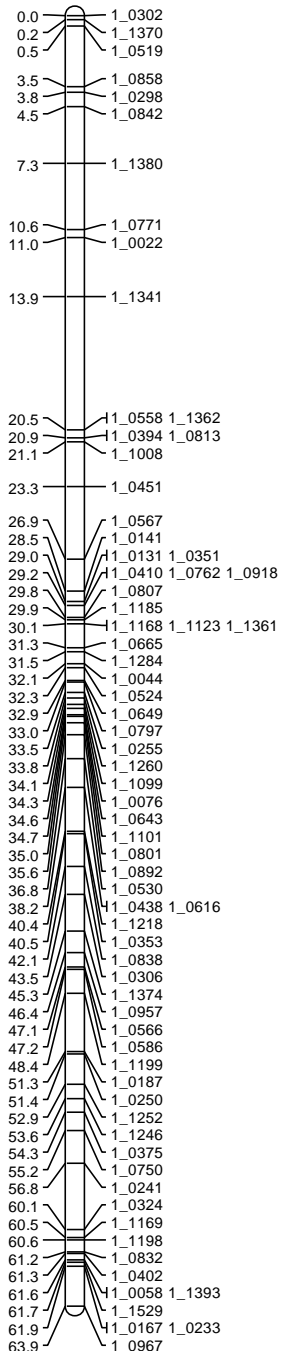

9

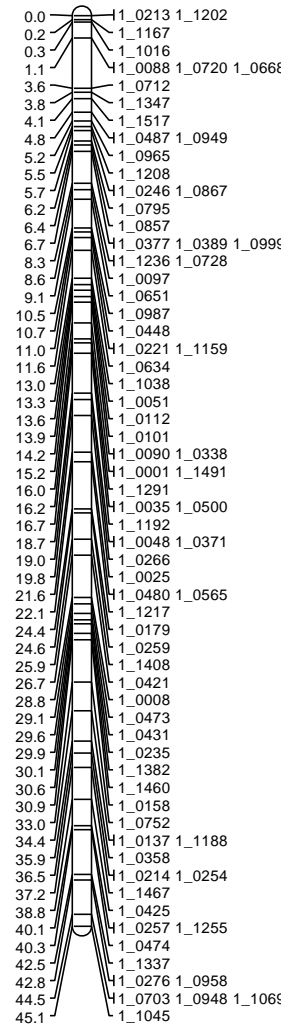

10

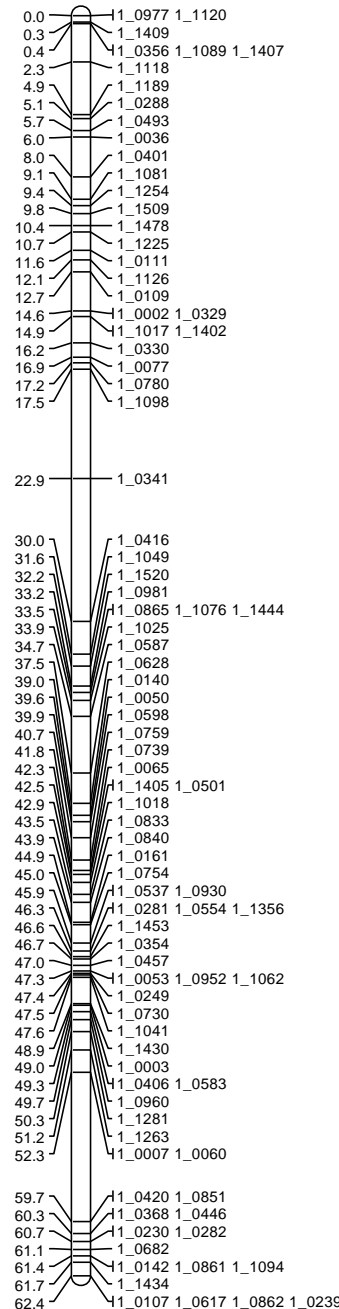

11

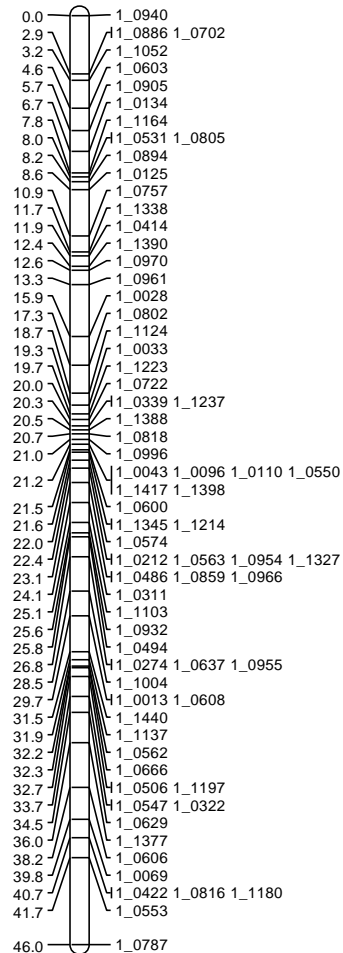

Supplement: 12864_2014_6024_MOESM2_ESM.pdf [file 12864_2014_6024_MOESM2_ESM.pdf]
